# Supplementary material for: Systemic and local immunity following adoptive transfer of NY-ESO-1 SPEAR T cells in synovial sarcoma
Source: PubMed Central journal article supplement (PMC6813983; doi:10.1186/s40425-019-0762-2), 2019-10-24

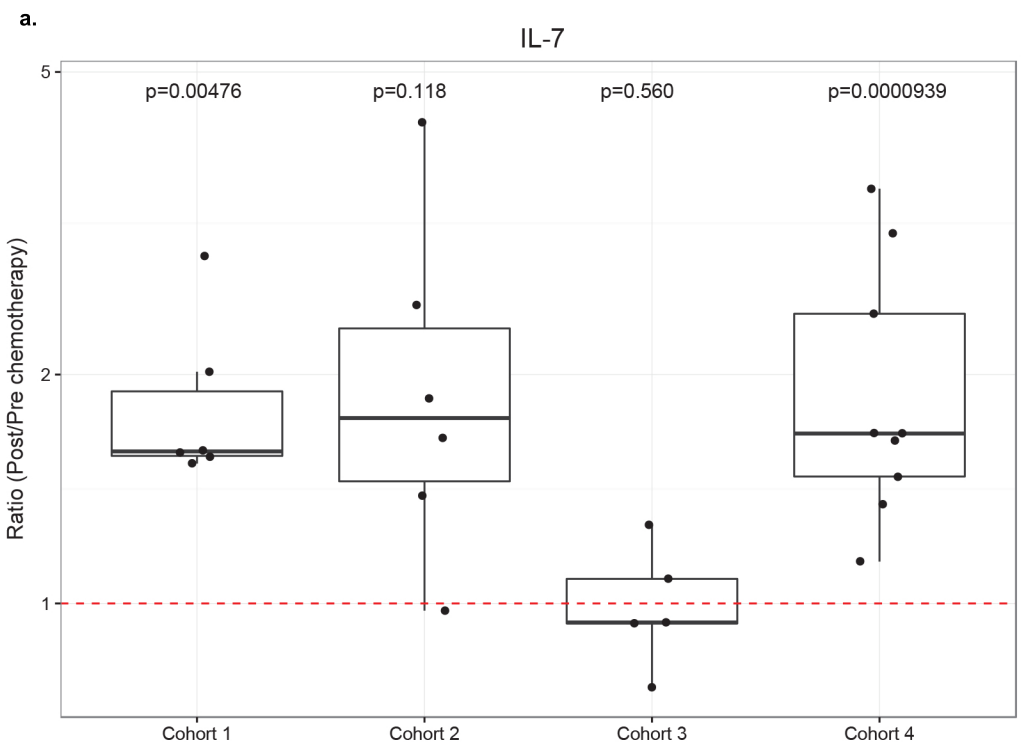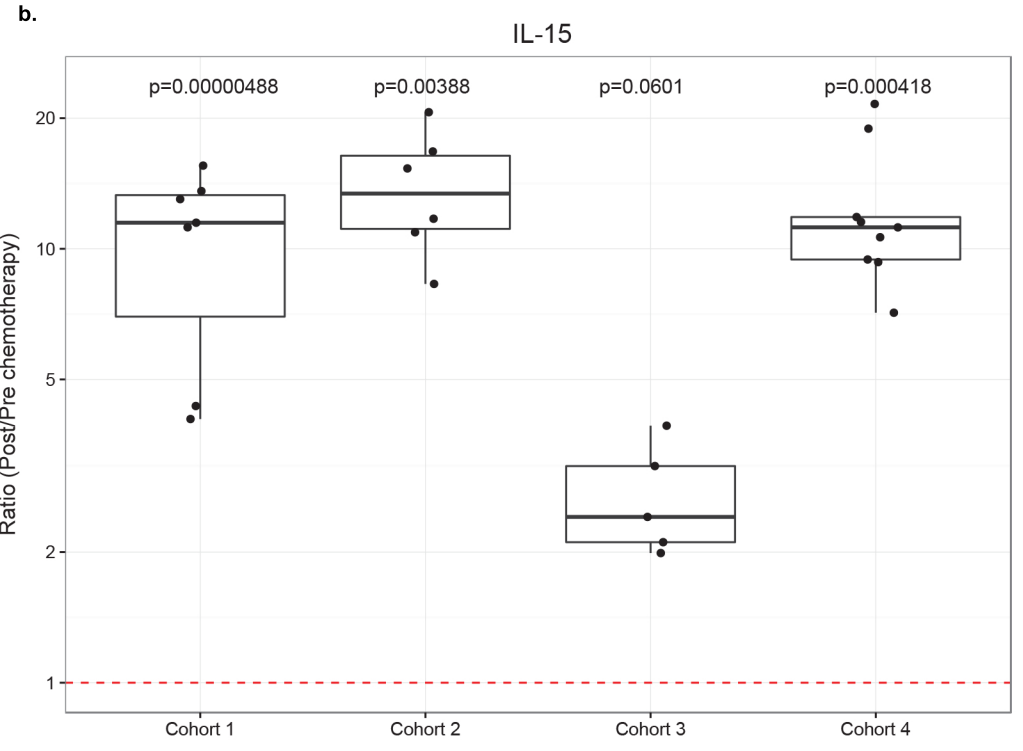

Supplement: 40425_2019_762_MOESM2_ESM.pdf [file 40425_2019_762_MOESM2_ESM.pdf]
